# Supplementary material for: Chronic Care Management for Substance Dependence in Primary Care Among Patients With Co-Occurring Disorders
Source: Atypon-hosted journal article supplement (doi:10.1176/appi.ps.201300414), 2014-09-15
Supplement: appi.ps.201300414.ds001.pdf [file appi.ps.201300414.ds001.pdf]

 


Psychiatry Online
