# Supplementary material for: Chronic Care Management for Substance Dependence in Primary Care Among Patients With Co-Occurring Disorders
Source: Atypon-hosted journal article supplement (doi:10.1176/appi.ps.201300414), 2014-09-15
Supplement: appi.ps.201300414.ds001.pdf [file appi.ps.201300414.ds001.pdf]

Figure 1. Screening, enrollment, randomization and follow-up

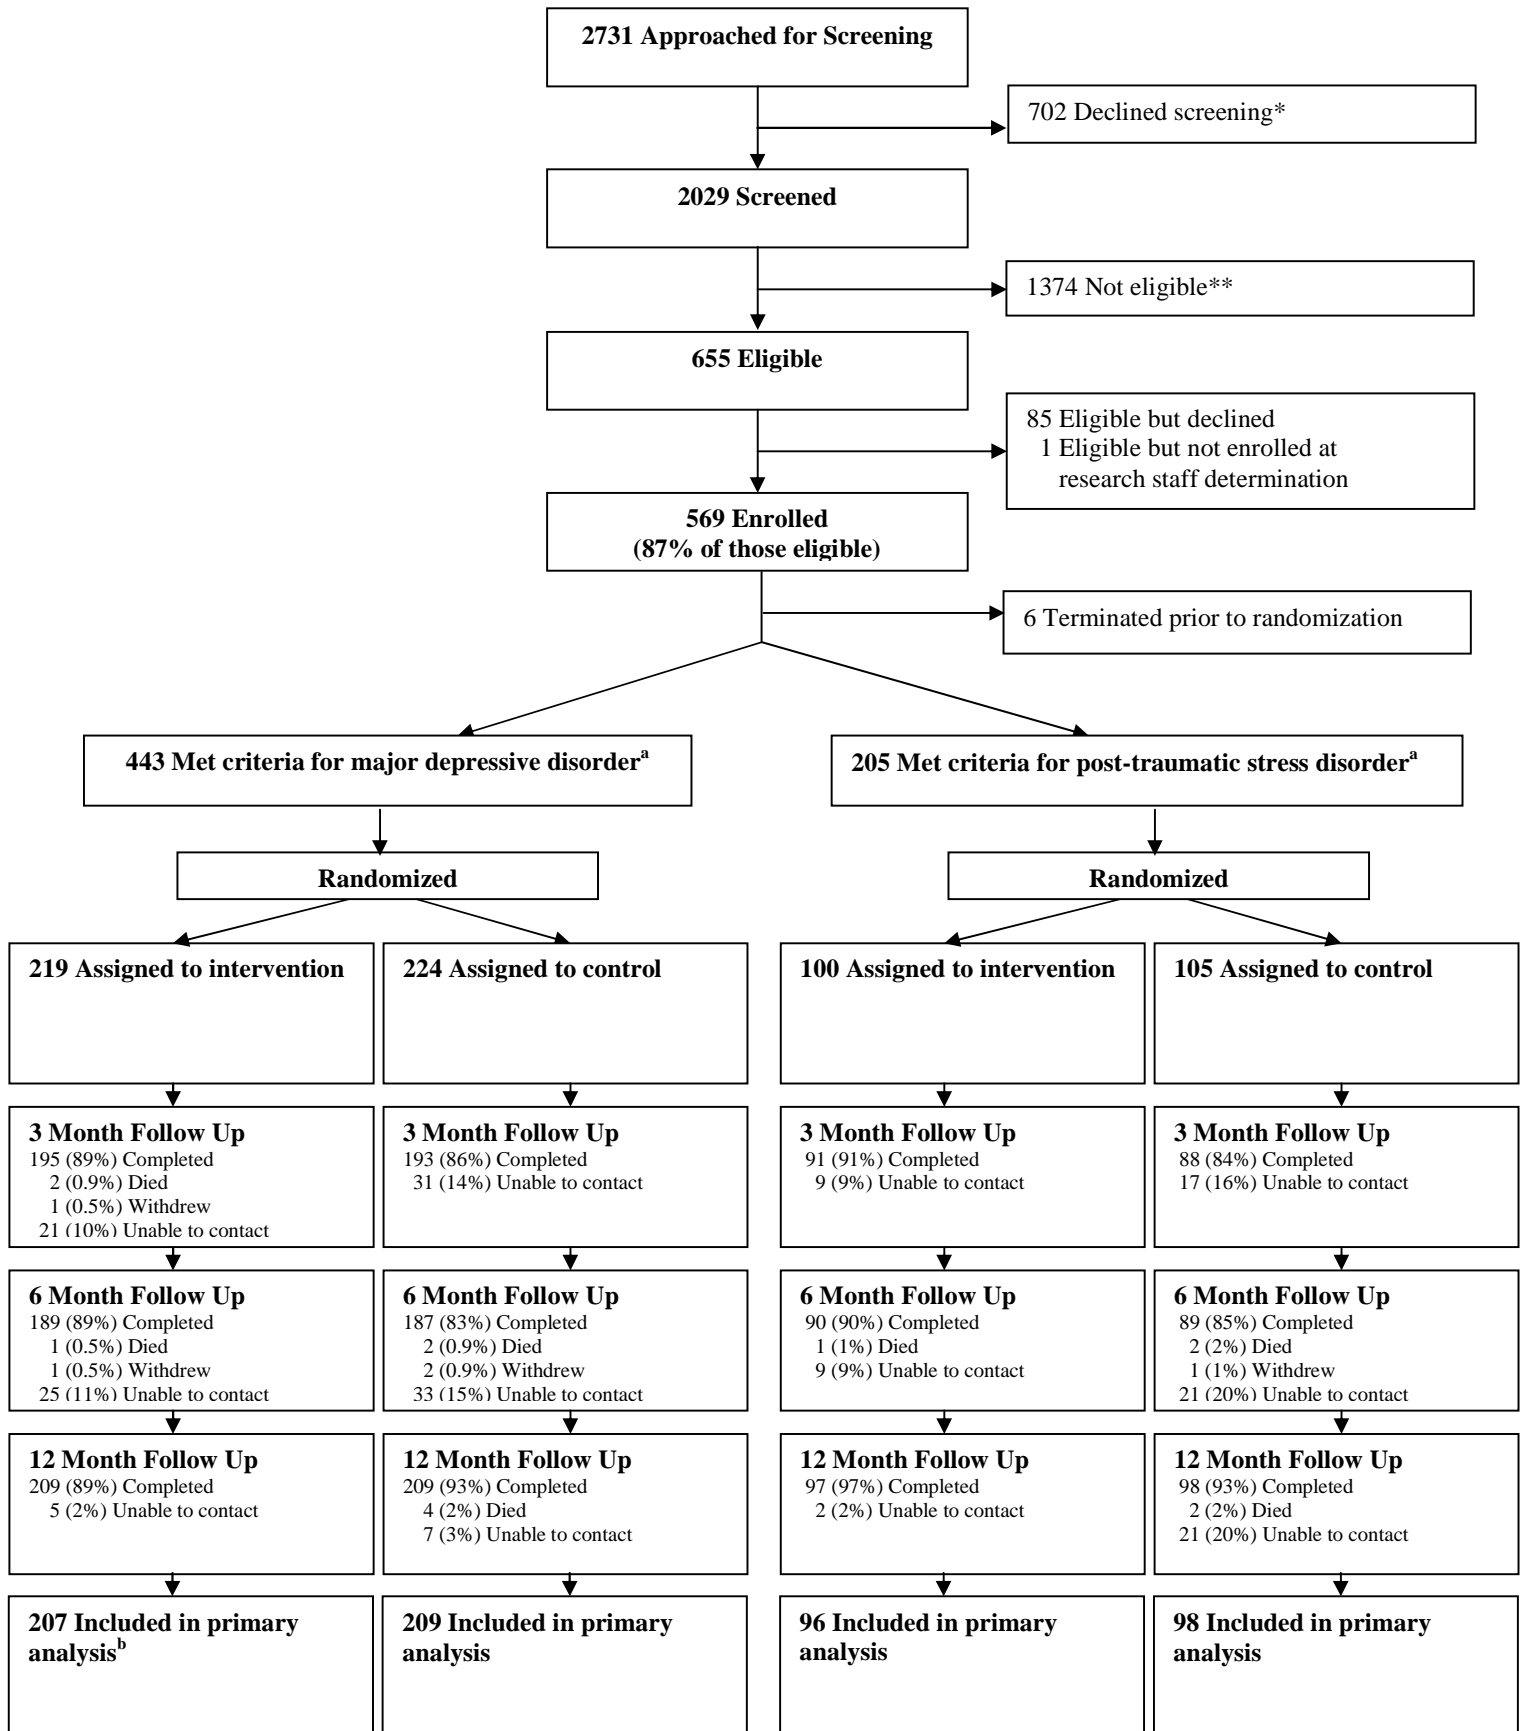

<sup>a</sup>Groups are not mutually exclusive; 193 participants met criteria for both major depressive disorder and post-traumatic stress disorder

<sup>b</sup>206 participants included in analysis of PHQ-9 outcome among those with major depressive disorder assigned intervention
